# Supplementary material
Source: publisher figshare collection journal article supplement (https://acs.figshare.com/ndownloader/files/4138840)
Supplement: Supplementary file 1 [file 4138840]

## Supporting Information for:

# Solid-state $^{91}\text{Zr}$ NMR Characterization of Layered and Three-dimensional Framework Zirconium Phosphates

by Andre Sutrisno,<sup>a</sup> Lei Liu,<sup>b</sup> Jinxiang Dong<sup>b</sup> and Yining Huang<sup>a,\*</sup>

Contribution from:

<sup>a</sup>Department of Chemistry, The University of Western Ontario, London, Ontario, Canada N6A 5B7. <sup>b</sup>Research Institute of Special Chemicals, Taiyuan University of Technology, Taiyuan 030024, Shanxi (P.R. China).

|                                                                                                                               |          |
|-------------------------------------------------------------------------------------------------------------------------------|----------|
| Sample Preparation                                                                                                            | Page S2  |
| Experimental details for additional $^{31}\text{P}$ , $^{13}\text{C}$ , $^{19}\text{F}$ and $^6\text{Li}$ MAS NMR experiments | Page S4  |
| Table S1. Detailed $^{91}\text{Zr}$ SSNMR experimental conditions                                                             | Page S5  |
| Table S2. Comparison of $\alpha$ -ZrP and its derivatives with their interlayer spacings                                      | Page S6  |
| Table S3. Summary of relevant bond distances and angles for the Zr-based materials                                            | Page S7  |
| Table S4. Structural data for all the ZrP/ZrPOF materials investigated in this study                                          | Page S8  |
| Table S5. Calculated $^{91}\text{Zr}$ $C_Q$ values of zirconium phosphate model cluster for ZrPO <sub>4</sub> -DES1           | Page S8  |
| Figure S1. Powder XRD spectra of ion-exchanged ZrP studied in this work                                                       | Page S9  |
| Figure S2. $^{31}\text{P}$ MAS NMR spectra of ion-exchanged ZrP derivatives at 9.4 T                                          | Page S9  |
| Figure S3. (a) $^6\text{Li}$ and (b) $^7\text{Li}$ MAS NMR spectra of Li-ZrP at 9.4 T spinning at 8 kHz                       | Page S10 |
| Figure S4. $^{91}\text{Zr}$ static QCPMG NMR spectra of $\alpha$ -ZrP and its ion-exchanged derivatives at 21.1 T             | Page S10 |
| Figure S5. Correlation between various experimental $^{91}\text{Zr}$ NMR and structural parameters                            | Page S11 |
| Figure S6. Powder XRD spectra of all the ZrP/ZrPOF materials studied in this work                                             | Page S12 |
| Figure S7. $^{31}\text{P}$ MAS NMR spectra of all the ZrP/ZrPOF materials studied in this work                                | Page S13 |
| Figure S8. $^{13}\text{C}$ MAS NMR spectra of all the materials studied in this work at 9.4 T                                 | Page S13 |
| Figure S9. $^{91}\text{Zr}$ MAS NMR spectra of ZrPO <sub>4</sub> -DES8 at 21.1 T, showing signal from ZrO <sub>2</sub> rotor  | Page S14 |
| Figure S10. $^{19}\text{F}$ MAS NMR spectra of all the materials studied in this work at 9.4 T                                | Page S14 |
| References                                                                                                                    | Page S15 |

## Sample Preparation

The ion-exchanged phases of  $\alpha$ -ZrP were prepared according to the following previously reported procedures. **Preparation of initial  $\alpha$ -ZrP gel.** 8.05 g of zirconium oxychloride ( $\text{ZrOCl}_2 \cdot 8\text{H}_2\text{O}$ ) was added into a 200 mL of 3 M HCl solution. Then, a mixture of 115.2 mL of 3.32 M  $\text{H}_3\text{PO}_4$ , 50 mL of concentrated HCl and 35 mL of water was added slowly to the zirconium oxychloride solution with stirring and the gelatinous precipitates were allowed to stand overnight. They were then filtered, washed with 2%  $\text{H}_3\text{PO}_4$  until free of chloride ion and given a final wash with distilled, deionized water multiple times. **Synthesis of  $\alpha$ -ZrP.** 7.5 g of wet ZrP gel was added into 105 mL of 8.4 M  $\text{H}_3\text{PO}_4$  solution. The precipitates were then heated with constant stirring and refluxing for 4 days. They were then washed with distilled water several times. After separation of the solids by centrifugation, the product was dried in air at room temperature. **Preparation of K- and Li-ZrP ion-exchange.**<sup>1-3</sup> 0.6 g of  $\alpha$ -ZrP was dissolved in 120 mL of water. A solution of 0.1 M KOH/LiOH was added drop wise with stirring (pH = 10-12) and the solution was allowed to sit for one day. They were then filtered, washed three times with distilled water, and air-dried. **Preparation of Co-ZrP intercalation.**<sup>4</sup> 0.5 g of  $\alpha$ -ZrP was dissolved in 100 mL of water. A solution of 0.025 M  $\text{Co}(\text{NH}_3)_6\text{Cl}_3$  was added to the mixture, and were stirred under a reflux condenser for an hour at 75°C (pH = 2.8-3.5). They were then filtered, washed three times with distilled water, and air-dried.

All the other samples were also prepared according to the previously reported procedures. **ZrPO<sub>4</sub>-DES8.**<sup>5</sup> A Teflon-lined autoclave (total volume 23 mL) was charged with deep eutectic solvent (DES) made from oxalic acid (1.0 g, 7.94 mmol) and TPABr (3.2 g, 12.01 mmol),  $\text{ZrOCl}_2$  (250 mg, 0.76 mmol),  $\text{H}_3\text{PO}_4$  (177 mg, 1.54 mmol), HF (66  $\mu\text{L}$ , 1.52 mmol) and 1,4-dimethylpiperazine (175 mg, 1.53 mmol). The autoclave was then heated at 180 °C for 3 days. After cooling the autoclave to room temperature, the solid product was recovered by dissolving the eutectic mixture in distilled water and subsequent filtration. The white solid was then washed thoroughly acetone, and dried at room temperature. **ZrPO<sub>4</sub>-DES1 and ZrPO<sub>4</sub>-DES2.**<sup>6</sup> A typical synthesis procedure was as follows: a Teflon-

lined autoclave (volume 23 mL) was charged with appropriate quantities of deep eutectic solvent,  $\text{ZrOCl}_2 \cdot 8\text{H}_2\text{O}$ ,  $\text{H}_3\text{PO}_4$  and HF. The autoclave was then heated in an oven to the required temperature ( $180^\circ\text{C}$  for 3 days for all phases). For  $\text{ZrPO}_4\text{-DES1}$ : The DES consisted of urea (2.9 g, 48.3 mmol) and tetramethyl ammonium chloride (2.4 g, 21.9 mmol),  $\text{ZrOCl}_2 \cdot 8\text{H}_2\text{O}$  (250 mg, 0.76 mmol), HF (0.102 mL, 2.10 mmol) and  $\text{H}_3\text{PO}_4$  (179 mg, 1.55 mmol). For  $\text{ZrPO}_4\text{-DES2}$ : The DES consisted of urea (2.8 g, 46.6 mmol) and tetramethyl ammonium chloride (2.4 g, 21.9 mmol),  $\text{ZrOCl}_2 \cdot 8\text{H}_2\text{O}$  (250 mg, 0.76 mmol), HF (0.025 mL, 0.52 mmol) and  $\text{H}_3\text{PO}_4$  (181 mg, 1.57 mmol). **ZrPOF-pyr.**<sup>7</sup> The hydrothermal reactions were carried out under autogenous pressure in Teflon-lined stainless steel autoclaves (25 mL) with a filling of approximately 60%. First, the hydrogen fluoride was added to an aqueous solution of  $\text{ZrOCl}_2 \cdot 8\text{H}_2\text{O}$  and the mixture was stirred for about 10 min. Then phosphoric acid, followed by pyridine was added to the solution while continuing to stir. This produced a white gel. The molar ratios of the starting reactants used for a typical synthesis were 3 HF : 1  $\text{ZrO}_2$  : 0.5  $\text{P}_2\text{O}_5$  : 3 pyridine : 100  $\text{H}_2\text{O}$ . The charged autoclaves were then placed in an oven at  $180^\circ\text{C}$  for 7 days. The crystalline products were filtered, washed with distilled water, and finally dried at  $60^\circ\text{C}$  overnight. **ZrPOF-Q1.**<sup>8</sup> The typical synthesis process as follows: First, the hydrogen fluoride was added to an aqueous solution of  $\text{ZrOCl}_2$  and the mixture was stirred for about 10 min. Then phosphoric acid, followed by quinoline was added to the solution while continuing to stir. The molar ratios of the starting reactants was 2 HF : 1  $\text{ZrO}_2$  : 1  $\text{P}_2\text{O}_5$  : 3 quinoline : 100  $\text{H}_2\text{O}$ . The mixture was sealed in a 30 mL Teflon-lined stainless steel autoclave with a filling capacity of approximately 70% and heated at  $180^\circ\text{C}$  for 7 days under autogenous pressure. The crystalline products were separated by centrifugation, washed with distilled water, then washed with ethanol, and dried at room temperature in air. **ZrPOF-EA.**<sup>9</sup> A Teflon-lined autoclave (total volume 23 mL) was charged with deep eutectic solvent made from oxalic acid dihydrate (2.0 g, 15.88 mmol) and ethyl ammonium chloride (2 g, 24.50 mmol),  $\text{ZrOCl}_2 \cdot 8\text{H}_2\text{O}$  (250 mg, 0.76 mmol),  $\text{H}_3\text{PO}_4$  (177 mg, 1.54 mmol) and HF (75  $\mu\text{L}$ , 1.73 mmol). The autoclave was then heated at  $180^\circ\text{C}$  for 4 days and then cooled to room temperature. The solid product was washed thoroughly with acetone and water, and dried at

room temperature. **ZrPOF-DEA**. The synthesis for ZrPOF-DEA is similar to that of ZrPOF-EA but ethyl ammonium chloride was replaced by diethyl ammonium chloride in deep eutectic solvent. A Teflon-lined autoclave (total volume 23 mL) was charged with deep eutectic solvent made from oxalic acid dihydrate (2.0 g, 15.88 mmol) and diethyl ammonium chloride (2.7 g, 24.64 mmol),  $\text{ZrOCl}_2 \cdot 8\text{H}_2\text{O}$  (250 mg, 0.76 mmol),  $\text{H}_3\text{PO}_4$  (180 mg, 1.57 mmol) and HF (90  $\mu\text{L}$ , 2.08 mmol). The autoclave was then heated at 180 °C for 4 days and then cooled to room temperature. The solid product was washed thoroughly with acetone and water, and dried at room temperature.

**Experimental details for additional  $^{31}\text{P}$ ,  $^{13}\text{C}$ ,  $^{19}\text{F}$  and  $^6/7\text{Li}$  MAS NMR experiments acquired at 9.4 T.** All the  $^{31}\text{P}$ ,  $^{13}\text{C}$ ,  $^{19}\text{F}$  and  $^6/7\text{Li}$  MAS NMR spectra of all the materials studied in this work were acquired at 9.4 T on a Varian Infinity Plus 400 WB spectrometer using either a 4-mm HXY or a 5-mm HFX T3 MAS probe [ $\nu_0 = 161.7, 100.4, 375.8, 58.8$  and  $155.3$  MHz for  $^{31}\text{P}$ ,  $^{13}\text{C}$ ,  $^{19}\text{F}$  and  $^6\text{Li}$  and  $^7\text{Li}$  respectively]. Standard samples used for pulse calibration and chemical shift referencing were ADP ( $\text{NH}_4\text{H}_2\text{PO}_4$ , solid,  $\delta_{\text{iso}} = 1.33$  ppm, relative to 85%  $\text{H}_3\text{PO}_4$  in  $\text{H}_2\text{O}$ ), adamantane ( $\text{C}_{10}\text{H}_{16}$ , solid,  $\delta_{\text{iso}} = 38.5$  ppm for higher frequency resonance, relative to TMS in  $\text{CDCl}_3$ ), TFT ( $\text{C}_6\text{H}_5\text{CF}_3$ , 1 M solution,  $\delta_{\text{iso}} = -65.4$  ppm, relative to  $\text{CFCl}_3$ ) and LiCl (1 M solution,  $\delta_{\text{iso}} = 0.0$  ppm) for  $^{31}\text{P}$ ,  $^{13}\text{C}$ ,  $^{19}\text{F}$  and  $^6/7\text{Li}$  respectively. A single-pulse with proton decoupling was used in all experiments, applying small ( $< 30^\circ$ ) tip angle. The pulse delays used were 60, 5, 5, 5 and 1 second(s) for  $^{31}\text{P}$ ,  $^{13}\text{C}$ ,  $^{19}\text{F}$ ,  $^6\text{Li}$  and  $^7\text{Li}$  respectively.

**Table S1.** Detailed  $^{91}\text{Zr}$  SSNMR experimental conditions.

| Sample                  | Type of experiment   | pulse length ( $\mu\text{s}$ ) | SW (kHz) | $\tau_a$ ( $\mu\text{s}$ ) | M (# of loops) | $\tau_1$ ( $\mu\text{s}$ ) | $\tau_2$ ( $\mu\text{s}$ ) | $\tau_3$ ( $\mu\text{s}$ ) | $\tau_4$ ( $\mu\text{s}$ ) | # scans |
|-------------------------|----------------------|--------------------------------|----------|----------------------------|----------------|----------------------------|----------------------------|----------------------------|----------------------------|---------|
| K-ZrP                   | MAS echo 12.5kHz     | 3                              | 500      | ---                        | ---            | 77                         | ---                        | ---                        | ---                        | 10240   |
|                         | static echo          | 3                              | 250      | ---                        | ---            | 97                         | ---                        | ---                        | ---                        | 65536   |
|                         | static WURST-QCPMG   | 50                             | 200      | 1000                       | 32             | 69                         | 70                         | 70                         | 70                         | 4096    |
| Li-ZrP                  | MAS echo 12.5kHz     | 3                              | 500      | ---                        | ---            | 77                         | ---                        | ---                        | ---                        | 49820   |
|                         | static echo          | 3                              | 250      | ---                        | ---            | 97                         | ---                        | ---                        | ---                        | 77824   |
|                         | static WURST-QCPMG   | 50                             | 200      | 1000                       | 32             | 69                         | 70                         | 70                         | 70                         | 8192    |
| Co-ZrP                  | MAS echo 12.5kHz     | 3                              | 500      | ---                        | ---            | 77                         | ---                        | ---                        | ---                        | 10240   |
|                         | static echo          | 3                              | 250      | ---                        | ---            | 97                         | ---                        | ---                        | ---                        | 16384   |
|                         | static WURST-QCPMG   | 50                             | 200      | 1000                       | 32             | 69                         | 70                         | 70                         | 70                         | 2048    |
| ZrPO <sub>4</sub> -DES8 | MAS echo 20kHz       | 2                              | 500      | ---                        | ---            | 48                         | ---                        | ---                        | ---                        | 56108   |
|                         | static echo          | 2                              | 250      | ---                        | ---            | 97                         | ---                        | ---                        | ---                        | 6600    |
|                         | static WURST-QCPMG   | 50                             | 500      | 200                        | 32             | 29                         | 30                         | 30                         | 30                         | 256     |
| ZrPO <sub>4</sub> -DES1 | MAS 1 pulse 20kHz    | 2                              | 50       | ---                        | ---            | ---                        | ---                        | ---                        | ---                        | 4096    |
|                         | static echo          | 2                              | 250      | ---                        | ---            | 97                         | ---                        | ---                        | ---                        | 989     |
|                         | static echo (14.1 T) | 1.2                            | 200      | ---                        | ---            | 97                         | ---                        | ---                        | ---                        | 160960  |
| ZrPO <sub>4</sub> -DES2 | MAS 1 echo 20kHz     | 2                              | 500      | ---                        | ---            | 48                         | ---                        | ---                        | ---                        | 49152   |
|                         | static echo          | 2                              | 250      | ---                        | ---            | 97                         | ---                        | ---                        | ---                        | 4096    |
|                         | static WURST-QCPMG   | 50                             | 500      | 500                        | 32             | 29                         | 30                         | 30                         | 30                         | 6550    |
| ZrPOF-pyr               | static echo          | 2                              | 500      | ---                        | ---            | 97                         | ---                        | ---                        | ---                        | 43400   |
|                         | static WURST-QCPMG   | 50                             | 500      | 200                        | 32             | 29                         | 30                         | 30                         | 30                         | 7200    |
| ZrPOF-Q1                | static echo          | 2                              | 500      | ---                        | ---            | 97                         | ---                        | ---                        | ---                        | 45861   |
|                         | static WURST-QCPMG   | 50                             | 500      | 200                        | 32             | 29                         | 30                         | 30                         | 30                         | 512     |
| ZrPOF-EA                | MAS echo 20kHz       | 2                              | 500      | ---                        | ---            | 48                         | ---                        | ---                        | ---                        | 83968   |
|                         | static echo          | 2                              | 500      | ---                        | ---            | 97                         | ---                        | ---                        | ---                        | 12900   |
|                         | static WURST-QCPMG   | 50                             | 500      | 200                        | 32             | 29                         | 30                         | 30                         | 30                         | 6239    |
| ZrPOF-DEA               | static WURST-QCPMG   | 50                             | 500      | 200                        | 32             | 29                         | 30                         | 30                         | 30                         | 2520    |

**Table S2.** Comparison of  $\alpha$ -ZrP and its derivatives with their interlayer spacings.

| Sample        | $d_{\text{(this work)}} (\text{\AA})$ | $d_{\text{(previous work)}} (\text{\AA})$ | Ref. | % of ion-exchanged |
|---------------|---------------------------------------|-------------------------------------------|------|--------------------|
| $\alpha$ -ZrP | 7.52                                  | 7.56                                      | a    | N/A                |
| Li-ZrP        | 10.25                                 | 10.1                                      | b, c | 100                |
| K-ZrP         | 10.72                                 | 10.8                                      | a, d | 100                |
| Co-ZrP        | 11.31                                 | 11.16                                     | e    | ~30                |

List of references: (a) Clearfield, A.; Stynes, J. A. *J. Inorg. Nucl. Chem.* **1964**, 26, 117; (b) Clearfield, A.; Troup, J. J. *Phys. Chem.* **1970**, 74, 314; (c) Alberti, G.; Constantino, U.; Allulli, S.; Massucci, M. A.; Pelliccioni, M. *J. Inorg. Nucl. Chem.* **1973**, 35, 1347; (d) Clearfield, A.; Duax, W. L.; Garces, J. M.; Medina, A. S. *J. Inorg. Nucl. Chem.* **1972**, 34, 329; (e) Hasegawa, Y.; Kizaki, S.; Amekura, H. *Bull. Chem. Soc. Jpn.* **1983**, 56, 734.

**Table S3.** Summary of relevant bond distances and angles for the Zr-based materials.

| Compound                                                            | Zr–O bond distances (Å)                                                                         | O–Zr–O bond angles (degrees)                                                                                                                                          |
|---------------------------------------------------------------------|-------------------------------------------------------------------------------------------------|-----------------------------------------------------------------------------------------------------------------------------------------------------------------------|
| $\alpha$ -ZrP (ZrO <sub>6</sub> )                                   | 2.049, 2.054, 2.065, 2.071,<br>2.074, 2.075                                                     | 88.9, 89.0, 89.4, 89.5, 89.8, 89.9,<br>( $\times 2$ ), 90.0, 90.5, 91.1 ( $\times 2$ ), 91.2                                                                          |
| K-ZrP (ZrO <sub>6</sub> )                                           | 1.912, 2.012, 2.082, 2.123,<br>2.144, 2.213                                                     | 81.0, 81.4, 83.1, 85.1, 88.8, 90.7,<br>92.4 ( $\times 2$ ), 93.0, 94.4, 95.5, 102.8                                                                                   |
| K-ZrP (ZrO <sub>6</sub> ) –<br>CASTEP-opt                           | 2.035, 2.052, 2.067, 2.075,<br>2.098, 2.099                                                     | 83.0, 83.1, 85.9, 87.2, 87.7, 89.7,<br>90.6, 90.9, 91.9, 94.1, 98.6, 99.3                                                                                             |
| ZrPO <sub>4</sub> -DES8<br>(ZrO <sub>6</sub> )                      | 2.035, 2.048, 2.050, 2.069<br>( $\times 2$ ), 2.109                                             | 87.4, 87.6, 88.4, 88.8, 89.6, 90.3<br>( $\times 2$ ), 90.4, 91.0, 91.7, 91.8, 92.8                                                                                    |
| ZrPO <sub>4</sub> -DES1<br>(ZrF <sub>2</sub> O <sub>4-trans</sub> ) | 2.052 ( $\times 2$ ), 2.068 ( $\times 2$ );<br><i>2.009 (<math>\times 2</math>)<sup>a</sup></i> | 88.5( $\times 2$ ), 91.5( $\times 2$ ); <i>87.9(<math>\times 2</math>),<br/>89.5(<math>\times 2</math>), 90.5(<math>\times 2</math>), 92.1(<math>\times 2</math>)</i> |
| ZrPO <sub>4</sub> -DES2<br>(ZrFO <sub>5</sub> )                     | 2.047, 2.048, 2.056, 2.065<br>( $\times 2$ ); <i>2.016</i>                                      | 88.7, 89.1, 89.3, 89.6, 90.3, 90.5,<br>90.7, 95.2; <i>86.8, 88.9, 89.9, 91.2</i>                                                                                      |
| ZrPOF-pyr – site<br>1 (ZrO <sub>6</sub> )                           | 1.923, 2.009, 2.014, 2.046,<br>2.092 ( $\times 2$ )                                             | 86.2, 86.8, 87.1 ( $\times 2$ ), 89.0 ( $\times 2$ ),<br>89.2, 91.4 ( $\times 2$ ), 92.8 ( $\times 2$ ), 97.8                                                         |
| ZrPOF-pyr – site<br>2 (ZrF <sub>2</sub> O <sub>4-cis</sub> )        | 2.007, 2.060 ( $\times 2$ ), 2.111;<br><i>1.947, 2.127</i>                                      | 90.5 ( $\times 2$ ), 93.2 ( $\times 2$ ), 94.3; <i>81.7,</i><br><i>86.9 (<math>\times 2</math>), 88.6 (<math>\times 2</math>), 101.1; 82.9<sup>b</sup></i>            |
| ZrPOF-pyr – site<br>3 (ZrFO <sub>5</sub> )                          | 2.030, 2.066, 2.076 ( $\times 2$ ),<br>2.161; <i>2.141</i>                                      | 86.9 ( $\times 2$ ), 91.2 ( $\times 2$ ), 92.1, 92.9,<br>( $\times 2$ ), 98.3; <i>82.9, 86.8, 89.1 (<math>\times 2</math>)</i>                                        |
| ZrPOF-Q1 – site 1<br>(ZrO <sub>6</sub> )                            | 2.030, 2.044, 2.050, 2.055,<br>2.057, 2.071                                                     | 87.4, 87.9, 88.4, 88.5, 88.9, 90.0,<br>90.6, 90.7, 91.1 ( $\times 2$ ), 92.1, 93.6                                                                                    |
| ZrPOF-Q1 – site 2<br>(ZrO <sub>6</sub> )                            | 2.048, 2.054 ( $\times 3$ ),<br>2.056, 2.087                                                    | 86.0, 87.3 ( $\times 2$ ), 87.9, 88.8, 89.8,<br>90.9 ( $\times 2$ ), 91.9, 92.2, 93.0, 94.1                                                                           |
| ZrPOF-Q1 – site 3<br>(ZrO <sub>6</sub> )                            | 2.032, 2.043, 2.046, 2.051<br>( $\times 2$ ), 2.067                                             | 86.5, 87.9, 88.8, 88.9 ( $\times 2$ ), 89.0,<br>89.9, 90.0, 90.2, 92.1, 93.2, 94.4                                                                                    |
| ZrPOF-Q1 – site 4<br>(ZrF <sub>4</sub> O <sub>2</sub> )             | 2.067, 2.085; <i>2.032, 2.042</i><br><i>(<math>\times 2</math>), 2.050</i>                      | 95.2; <i>85.8, 87.4, 89.2, 90.1, 90.2</i><br><i>(<math>\times 2</math>); 84.6, 88.5, 91.8, 93.5, 94.4</i>                                                             |

<sup>a</sup>The numbers in italicized and blue indicate one F atom is involved instead of one O atom. <sup>b</sup>The numbers in italicized and red indicate two F atoms are involved instead of two O atoms.

**Table S4.** Structural data for all the ZrP/ZrPOF materials investigated in this study.

| Compound                | Ref. | # of Zr sites;<br>Zr coordination (site symmetry)                                                 | # of P, F sites | Space group                         | Unit cell volume (Å <sup>3</sup> ) |
|-------------------------|------|---------------------------------------------------------------------------------------------------|-----------------|-------------------------------------|------------------------------------|
| ZrPO <sub>4</sub> -DES8 | 5    | 1; ZrO <sub>6</sub> (C <sub>1</sub> )                                                             | 2, 0            | <i>P</i> 2 <sub>1</sub> /c (no. 14) | 1,060                              |
| ZrPO <sub>4</sub> -DES1 | 6    | 1; ZrF <sub>2</sub> O <sub>4</sub> (C <sub>i</sub> )                                              | 1, 1            | <i>P</i> -1 (no. 2)                 | 315                                |
| ZrPO <sub>4</sub> -DES2 | 6    | 1; ZrFO <sub>5</sub> (C <sub>1</sub> )                                                            | 2, 1            | <i>C</i> 2 (no. 5)                  | 1,035                              |
| ZrPOF-pyr               | 7    | 3; 1 ZrO <sub>6</sub> , 1 ZrFO <sub>5</sub> , 1 ZrF <sub>2</sub> O <sub>4</sub> (C <sub>s</sub> ) | 4, 2            | <i>P n n m</i> (no. 58)             | 1,920                              |
| ZrPOF-Q1                | 8    | 4; 3 ZrO <sub>6</sub> , 1 ZrF <sub>4</sub> O <sub>2</sub> (C <sub>1</sub> )                       | 6, 4            | <i>P</i> -1 (no. 2)                 | 1,980                              |
| ZrPOF-EA                | 9    | 8; 4 ZrO <sub>6</sub> , 4 ZrFO <sub>5</sub> (C <sub>s</sub> )                                     | 12, 2           | <i>P b a m</i> (no. 55)             | 4,895                              |

**Table S5.** Calculated <sup>91</sup>Zr C<sub>Q</sub> values of zirconium phosphate model cluster for ZrPO<sub>4</sub>-DES1.

| <i>Figure 9a data</i> |                        | <i>Figure 9b data</i> |                        | <i>Figure 9c data</i>   |                        | <i>Figure 9d data</i>   |                        |
|-----------------------|------------------------|-----------------------|------------------------|-------------------------|------------------------|-------------------------|------------------------|
| two Zr-F bond (Å)     | C <sub>Q</sub>   (MHz) | two Zr-O bond (Å)     | C <sub>Q</sub>   (MHz) | two F-Zr-O angle (deg.) | C <sub>Q</sub>   (MHz) | two O-Zr-O angle (deg.) | C <sub>Q</sub>   (MHz) |
| 1.900                 | 46.21                  | 1.900                 | 75.29                  | 80                      | 48.15                  | 80                      | 31.09                  |
| 1.940                 | 25.93                  | 1.920                 | 64.13                  | 82                      | 40.88                  | 82                      | 24.94                  |
| 1.969                 | 13.10                  | 1.940                 | 53.54                  | 84                      | 33.59                  | 84                      | 18.83                  |
| 1.980                 | 10.12                  | 1.960                 | 43.35                  | 86                      | 26.31                  | 86                      | 13.04                  |
| 1.985                 | 9.05                   | 1.980                 | 33.62                  | 88                      | 19.06                  | 86.7                    | 9.08                   |
| 1.990                 | 8.00                   | 2.000                 | 24.35                  | 90                      | 11.85                  | 88.5*                   | 8.48                   |
| 1.995                 | 6.95                   | 2.020                 | 15.53                  | 90.3                    | 9.81                   | 90                      | 9.87                   |
| 1.996                 | 6.75                   | 2.027                 | 3.28                   | 92.1*                   | 8.48                   | 90.3                    | 8.59                   |
| 1.997                 | 6.54                   | 2.040                 | 9.58                   | 93.9                    | 7.90                   | 92                      | 15.04                  |
| 1.998*                | 6.34                   | 2.050                 | 5.50                   | 94                      | 11.27                  | 94                      | 21.17                  |
| 1.999                 | 6.50                   | 2.060                 | 7.12                   | 96                      | 18.71                  | 96                      | 27.52                  |
| 2.000                 | 6.71                   | 2.068*                | 8.48                   | 98                      | 26.13                  | 98                      | 33.87                  |
| 2.009                 | 8.48                   | 2.070                 | 8.72                   | 100                     | 33.50                  | 100                     | 40.14                  |
| 2.015                 | 9.74                   | 2.080                 | 10.87                  | 102                     | 40.81                  | 102                     | 46.27                  |
| 2.020                 | 10.73                  | 2.100                 | 15.98                  |                         |                        |                         |                        |
| 2.060                 | 23.63                  | 2.109                 | 14.56                  |                         |                        |                         |                        |
| 2.100                 | 36.98                  | 2.120                 | 22.94                  |                         |                        |                         |                        |
| 2.140                 | 49.05                  | 2.140                 | 29.59                  |                         |                        |                         |                        |
| 2.180                 | 59.98                  | 2.160                 | 35.92                  |                         |                        |                         |                        |
|                       |                        | 2.180                 | 41.96                  |                         |                        |                         |                        |

\*The asterisk sign indicates a minimum point on the curve; while the numbers in blue indicate crystallographic values.



**Figure S1.** Powder XRD patterns of ion-exchanged ZrP studied in this work. Asterisks (\*) indicate reflections from the initial  $\alpha$ -ZrP phase.

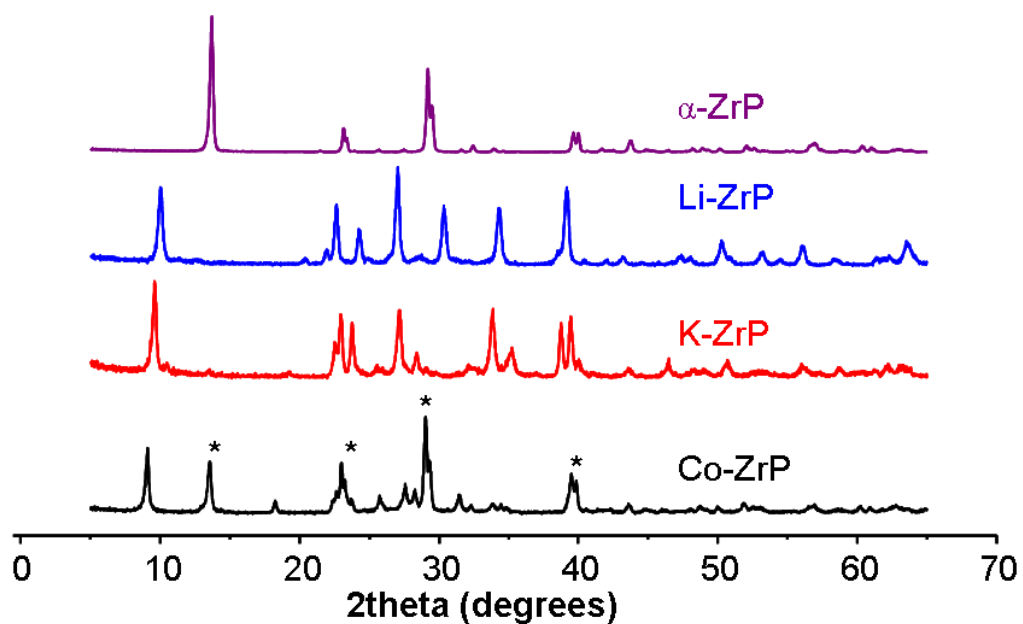

**Figure S2.**  $^{31}\text{P}$  MAS NMR spectra of ion-exchanged ZrP derivatives at 9.4 T.

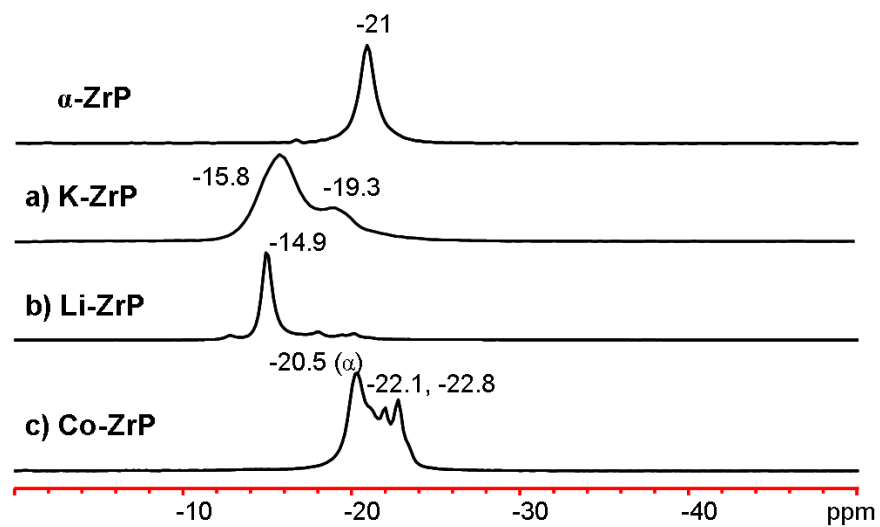

**Figure S3.** (a)  $^6\text{Li}$  and (b)  $^7\text{Li}$  MAS NMR spectra of Li-ZrP at 9.4 T spinning at 8 kHz. Asterisks (\*) indicate spinning sidebands from the satellite transition (ST).

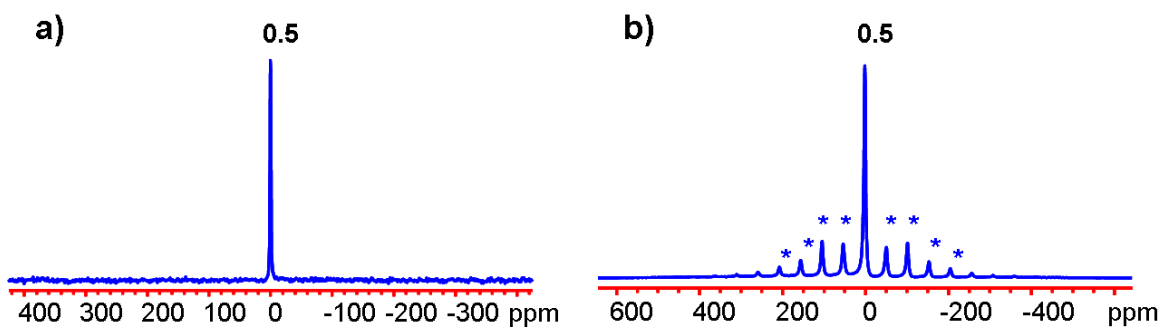

**Figure S4.**  $^{91}\text{Zr}$  static QCPMG NMR spectra of  $\alpha$ -ZrP and its ion-exchanged derivatives at 21.1T. For  $\text{NH}_4\text{-ZrP}$ , no experimental QCPMG spectrum was available at 21.1T. The spectrum shown was simulated using experimental NMR parameters obtained at lower fields reported earlier. Blue spectra indicate the new ones acquired in this work.

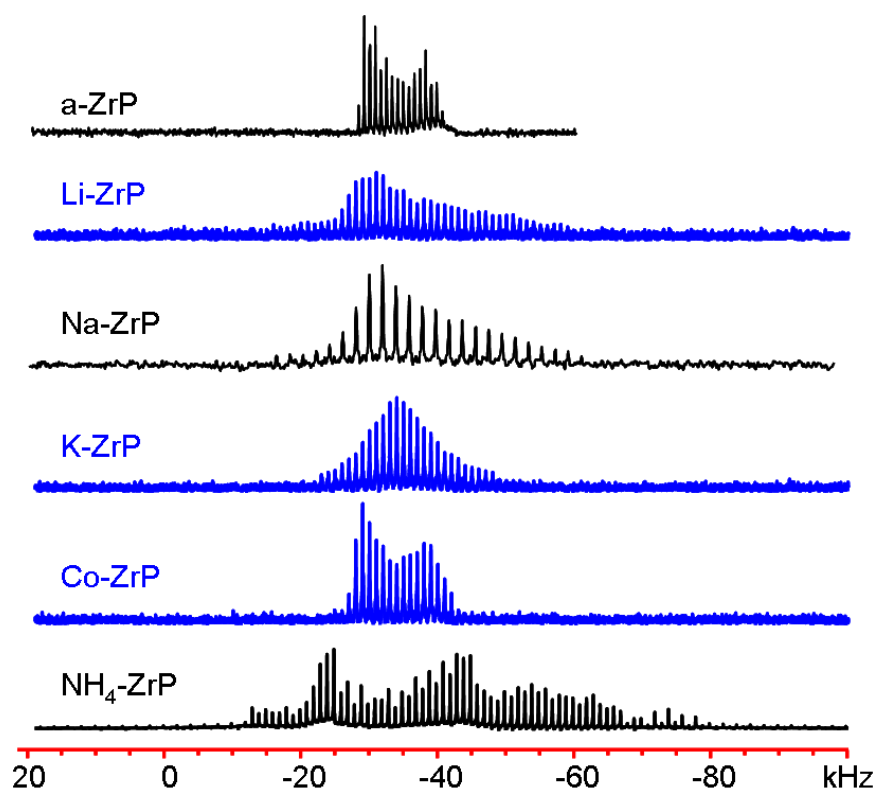

**Figure S5.** Correlation between various experimental  $^{91}\text{Zr}$  NMR and structural parameters. The five data points in solid blue were taken from the following paper: Yan, Z.; Kirby, C. W.; Huang, Y. *J. Phys. Chem. C* **2008**, *112*, 8575.

The definitions of each distortion parameter ( $|\Psi|$  and  $|\alpha|$ ) are as follows:  $|\Psi|$  or shear strain =  $(\sum |\tan(\theta_i - 90)|)$ , where  $\theta_i$  is the actual O–Zr–O angle and the sum runs over 12 angles;  $|\alpha|$  or longitudinal strain =  $(\sum |\ln(l_i - l_{\text{ave}})|)$ , where  $l_i$  is the actual Zr–O length and the sum runs over 6 bond lengths; for further details, see *Am. Mineral.* **1973**, *58*, 748.

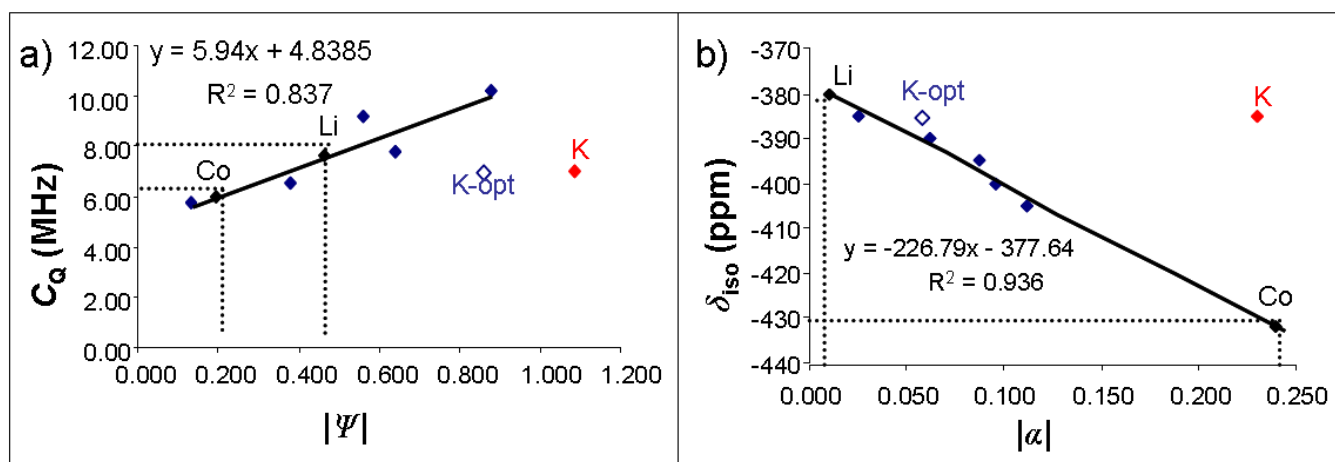

**Figure S6.** Powder XRD patterns of all the ZrP/ZrPOF materials studied in this work.

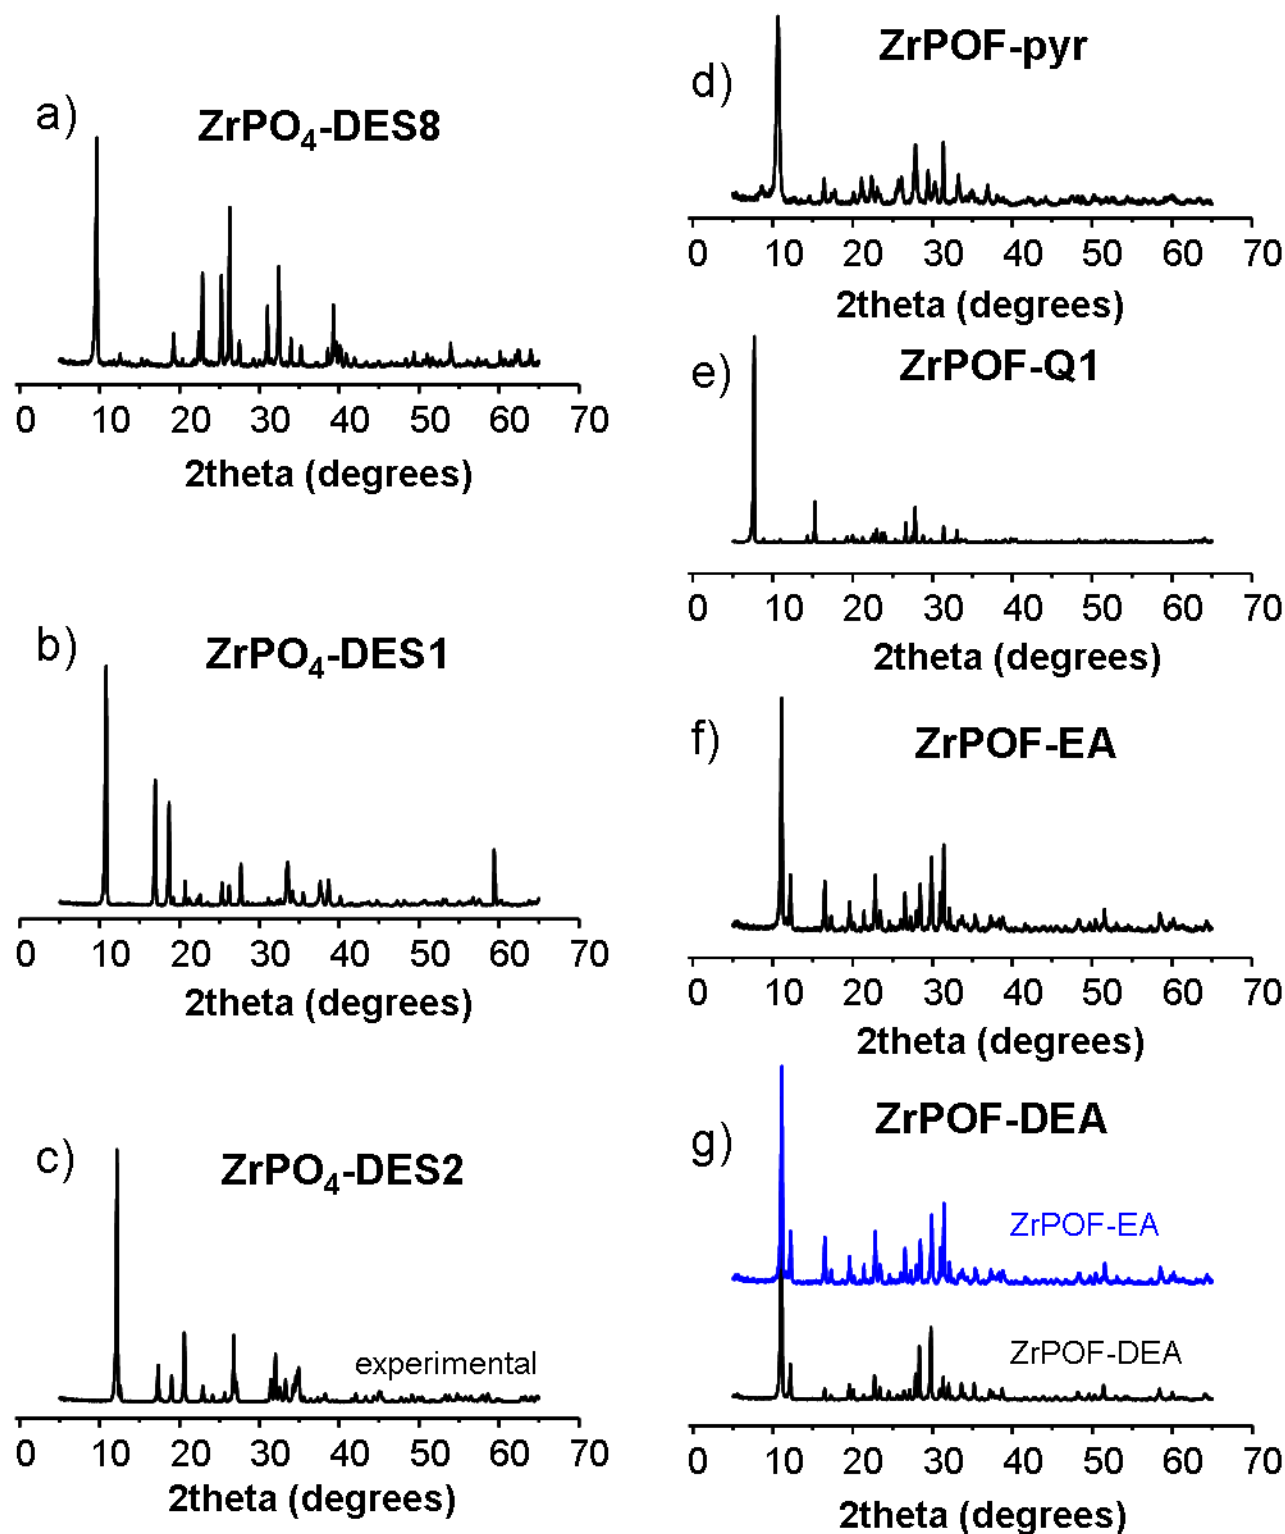

**Figure S7.**  $^{31}\text{P}$  MAS NMR spectra of all the ZrP/ZrPOF materials studied in this work at 7 or 8 kHz. Number signs (#) indicate impurities present.

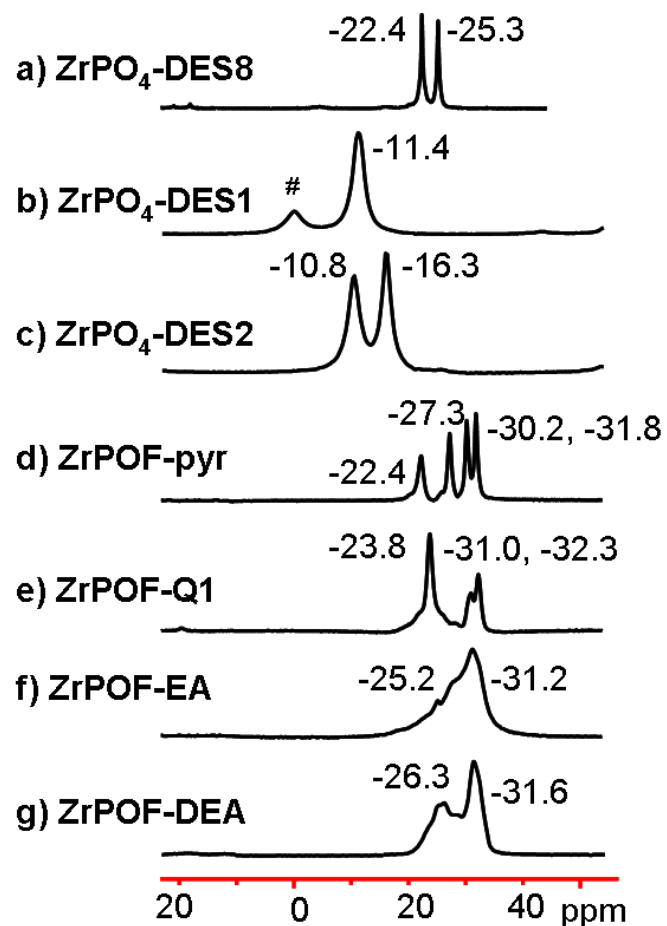

**Figure S8.**  $^{13}\text{C}$  MAS NMR spectra of all the materials studied in this work at 9.4 T. Asterisks (\*) indicate spinning sidebands. References for  $^{13}\text{C}$  NMR chemical shifts assignments: Piperidines (DMPIP in a): *J. Am. Chem. Soc.*, 1980, **102**, 3698-3707; Pyridine and Quinoline (b and c): Spectral Database for Organic Compounds (SDBS), [http://riodb01.ibase.aist.go.jp/sdbs/cgi-bin/cre\\_index.cgi](http://riodb01.ibase.aist.go.jp/sdbs/cgi-bin/cre_index.cgi); Acyclic and aliphatic amines (EA and DEA in d and e): *J. Am. Chem. Soc.*, 1973, **95**, 3710-3718.

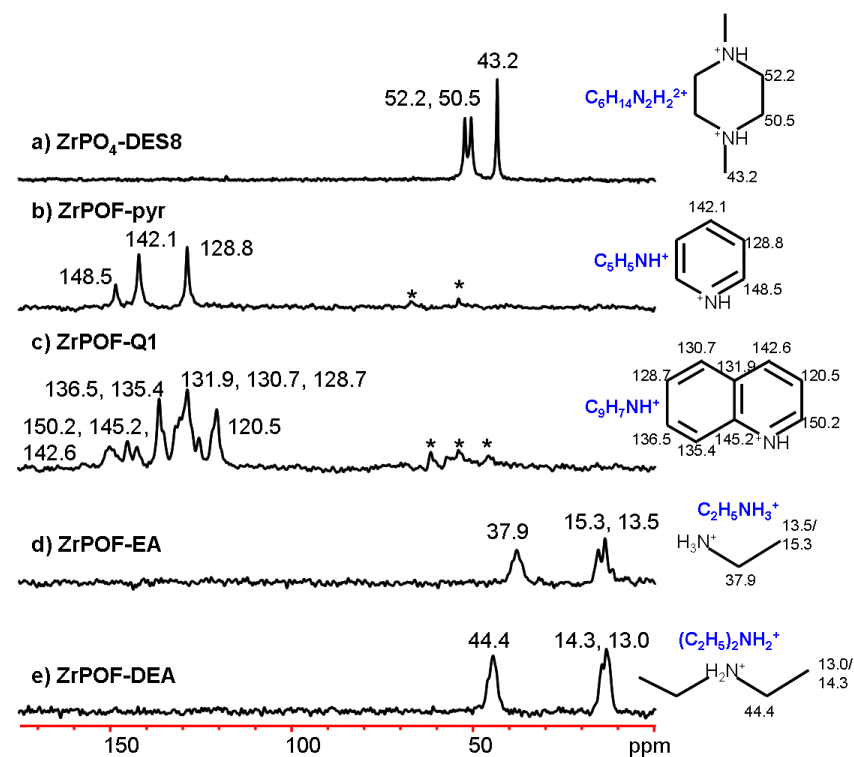

**Figure S9.**  $^{91}\text{Zr}$  MAS NMR spectra of  $\text{ZrPO}_4\text{-DES8}$  at 21.1 T, showing signal from  $\text{ZrO}_2$  rotor.

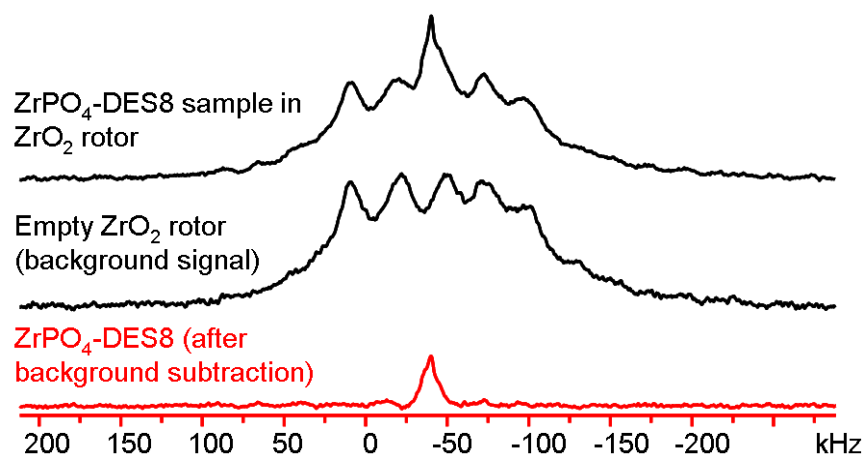

**Figure S10.**  $^{19}\text{F}$  MAS NMR spectra of all the materials studied in this work at 9.4 T, spinning at various speed ( $\nu_r$ ) indicated. Number signs (#) indicate isotropic chemical shifts, while the other unlabeled peaks are spinning sidebands. For each compound, at least two spectra were acquired at different spinning speeds in order to extract the isotropic chemical shifts. For (d), the individual F site can not be resolved due to band overlapping.

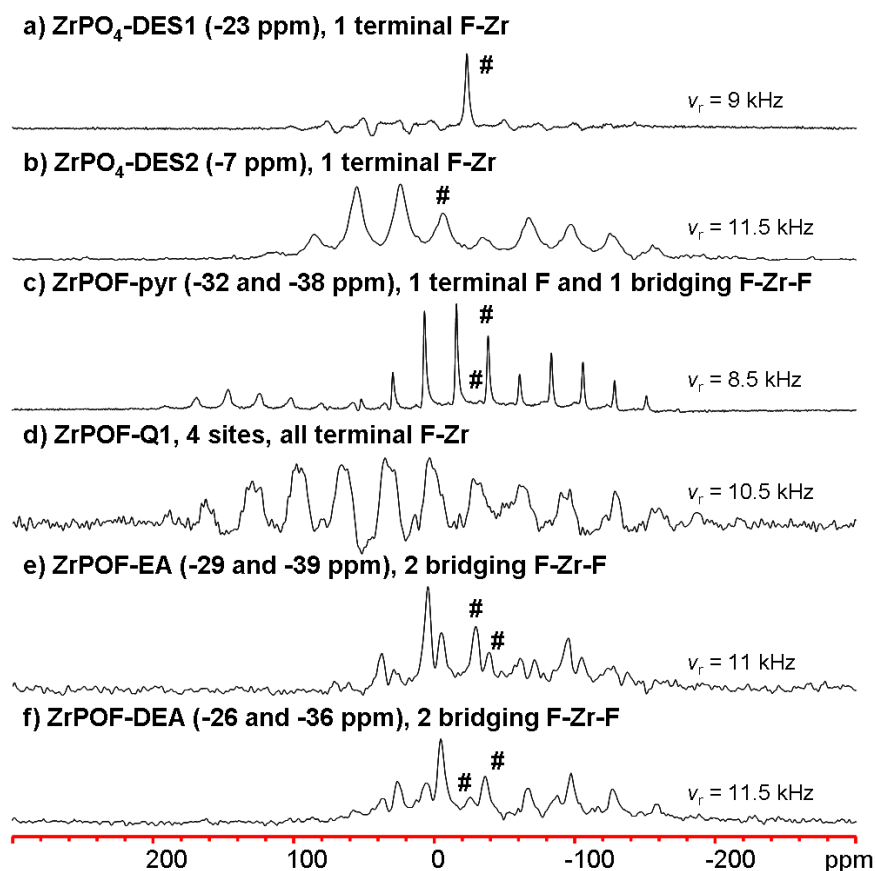

## References:

- (1) Clearfield, A.; Duax, W. L.; Garces, J. M.; Medina, A. S. *J. Inorg. Nucl. Chem.* **1972**, *34*, 329.
- (2) Clearfield, A.; Troup, J. *J. Phys. Chem.* **1970**, *74*, 314.
- (3) Alberti, G.; Constantino, U.; Allulli, S.; Massucci, M. A.; Pelliccioni, M. *J. Inorg. Nucl. Chem.* **1973**, *35*, 1347.
- (4) Hasegawa, Y.; Kizaki, S.; Amekura, H. *Bull. Chem. Soc. Jpn.* **1983**, *56*, 734.
- (5) Liu, L.; Chen, Z.-F.; Wei, H.-B.; Li, Y.; Fu, Y.-C.; Xu, H.; Li, J.-P.; Slawin, A. M. Z.; Dong, J. *Inorg. Chem.* **2010**, *49*, 8270.
- (6) Liu, L.; Li, Y.; Wei, H.; Dong, M.; Wang, J.; Slawin, A. M. Z.; Li, J.; Dong, J.; Morris, R. E. *Angew. Chem., Int. Ed.* **2009**, *48*, 2206.
- (7) Dong, J.; Liu, L.; Li, J.; Li, Y.; Baerlocher, C.; McCusker, L. B. *Microporous Mesoporous Mater.* **2007**, *104*, 185.
- (8) Liu, L.; Li, J.; Dong, J.; Sisak, D.; Baerlocher, C.; McCusker, L. B. *Inorg. Chem.* **2009**, *48*, 8947.
- (9) Liu, L.; Yang, J.; Li, J.; Dong, J.; Sisak, D.; Luzzatto, M.; McCusker, L. B. *Angew. Chem., Int. Ed.* **2011**, *50*, 8139.
